# Supplementary material for: Effect of the crystallization mechanism on zeolite BEA textural and acidic properties
Source: Royal Society of Chemistry journal article supplement (doi:10.1039/d1ce01618k), 2022-01-01
Supplement: d1ce01618k1.pdf [file d1ce01618k1.pdf]

## Supporting information

### Effect of crystallization mechanism on zeolite BEA textural and acidic properties

Tatiana O. Bok<sup>1</sup>, Egor P. Andriako<sup>1</sup>, Elena E. Knyazeva<sup>1,2</sup>, and Irina I. Ivanova\*<sup>1,2</sup>

<sup>1</sup>A.V. Topchiev Institute of Petrochemical Synthesis, Russian Academy of Sciences, Moscow, Russia.

<sup>2</sup>Department of Chemistry, Moscow State University, Moscow, Russia.

\*Email: [iiivanova@phys.chem.msu.ru](mailto:iiivanova@phys.chem.msu.ru)

**Table S1.** Acidity measured by TPD NH<sub>3</sub>

| Sample | Al*,<br>μmol/g | Content of weak<br>acid sites a <sub>1</sub> , μmol/g | Concent of strong<br>acid sites a <sub>2</sub> , μmol/g | Total concentration<br>of acid sites<br>a <sub>0</sub> (NH <sub>3</sub> ), μmol/g |
|--------|----------------|-------------------------------------------------------|---------------------------------------------------------|-----------------------------------------------------------------------------------|
| BEA-SM | 1300           | 670                                                   | 450                                                     | 1120                                                                              |
| BEA-SS | 1300           | 815                                                   | 535                                                     | 1350                                                                              |

- Determined by XRF analysis

**Table S2.** Acidity measured by FTIR of adsorbed Py

| Sample | Al*, μmol/g | B-sites**,<br>μmol/g | L-sites***,<br>μmol/g | Total acidity,<br>μmol Py/g | B/L  |
|--------|-------------|----------------------|-----------------------|-----------------------------|------|
| BEA-SM | 1300        | 510                  | 618                   | 1128                        | 0.83 |
| BEA-SS | 1300        | 601                  | 447                   | 1048                        | 1,34 |

\*XRF analysis

\*\*Calculated from IR band at 1545 cm<sup>-1</sup> using molar integral extinction coefficient of 0.73 cm/μmol taken from [1]

\*\*\* Calculated from IR band at 1454 cm<sup>-1</sup> using molar integral extinction coefficient of 0.96 cm/μmol taken from [1]

[1]. Mailer S.M., Jentys A., Lercher J.A. //J. Phys. Chem. C, 2011, 115, 8005-8013.

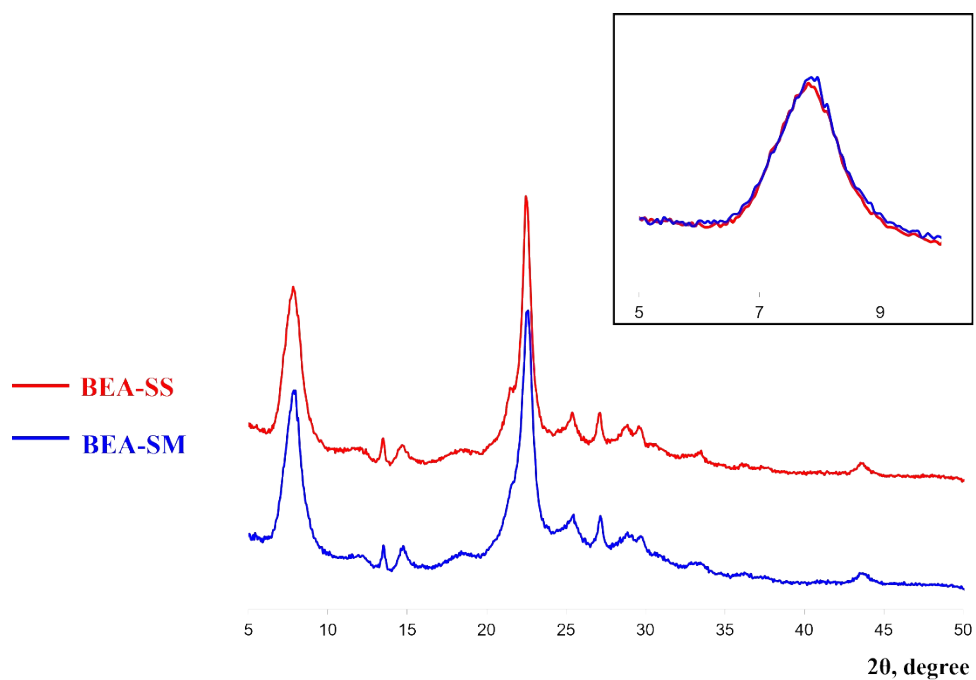

**Fig. S1.** XRD patterns obtained for BEA samples

The insert shows the region of  $5\text{-}10^\circ$   $2\theta$ . The deconvolution of this peak points to similar contribution of polymorphs A and B ( $A/B \sim 50/50$ ) for both samples.

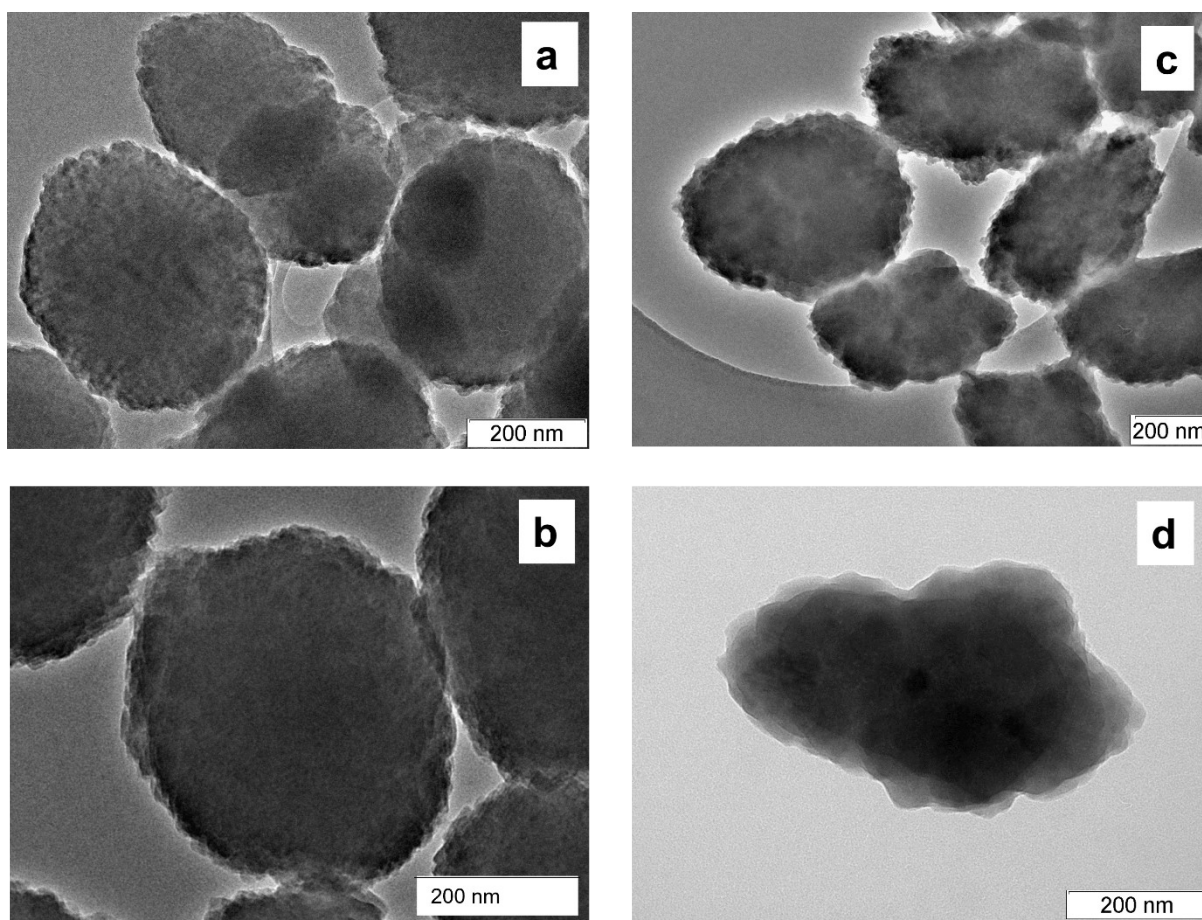

**Fig. S2.** TEM images of BEA-SM (a,b) and BEA-SS (c,d).

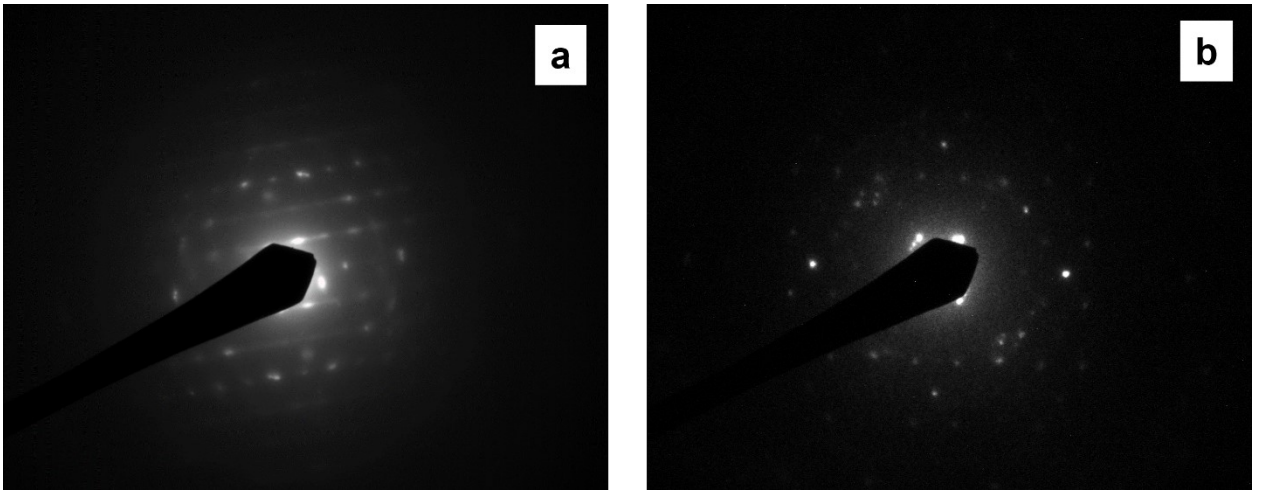

**Fig. S3.** Local electron diffraction patterns for BEA-SM (a) and BEA-SS (b).

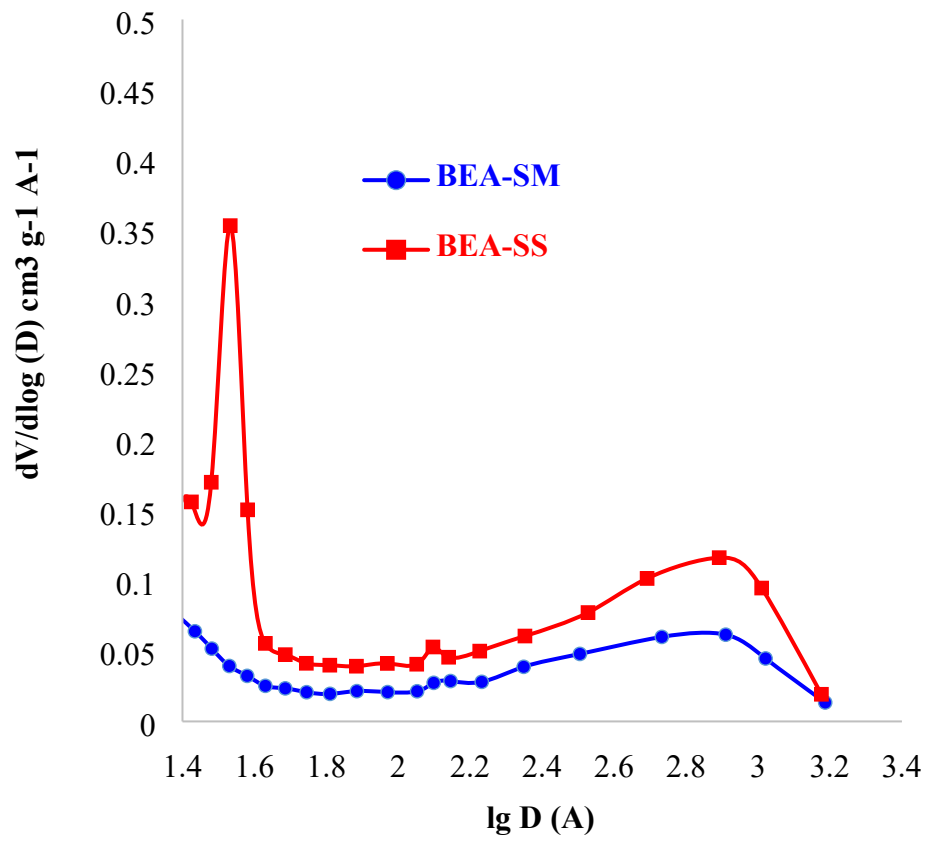

**Fig. S4.** Pore distribution for BEA samples.
